# Supplementary material for: A single-molecule magnet featuring a parallelogram [Dy4(OCH2–)4] core and two magnetic relaxation processes
Source: Royal Society of Chemistry journal article supplement (doi:10.1039/c3dt51785c), 2013-01-01
Supplement: c3dt51785c.pdf [file c3dt51785c.pdf]

Electronic Supplementary Information

**A Single-Molecule Magnet Featuring a Parallelogram  $[\text{Dy}_4(\text{OCH}_2)_4]$  Core and Two Magnetic Relaxation Processes**

Cai-Ming Liu,\* De-Qing Zhang, and Dao-Ben Zhu

*Beijing National Laboratory for Molecular Sciences, Center for Molecular Science, Key Laboratory of Organic Solids, Institute of Chemistry, CAS, Beijing 100190, P. R. China.*

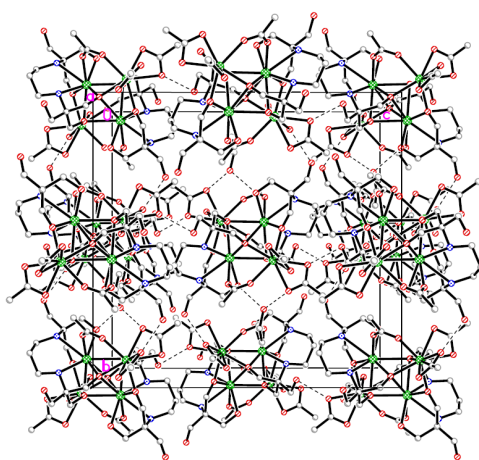

**Fig. S1.** Packing diagram of **1** viewed down the *a* axis.

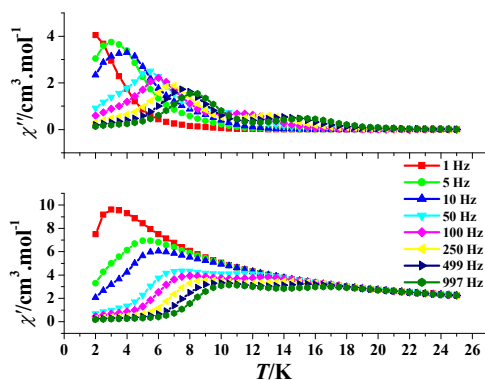

**Fig. S2.** Ac susceptibilities measured in a 2.5 Oe ac magnetic field for **1** ( $H_{dc} = 2000$  Oe).

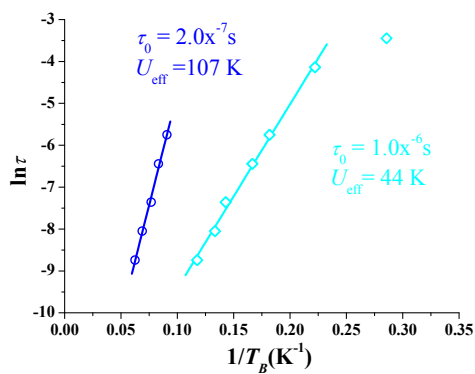

Fig. S3. Plots of  $\ln(\tau)$  versus  $1/T_B$  for **1** ( $H_{ac}=2.5$  Oe,  $H_{dc}=2000$  Oe), the solid lines represent the fitting with the Arrhenius law.

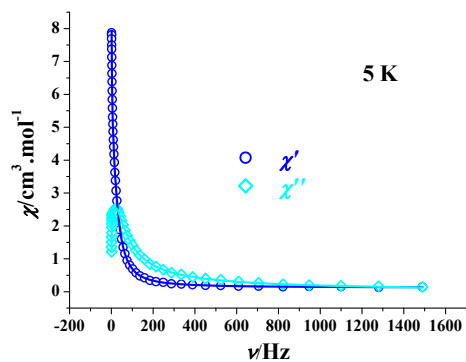

Fig. S4. Frequency dependence of the in-phase ( $\chi'$ , top) and out-of-phase ( $\chi''$ , bottom) ac susceptibility of **1** at 5 K. the solid lines represent the best fitting with the sum of two modified Debye functions.

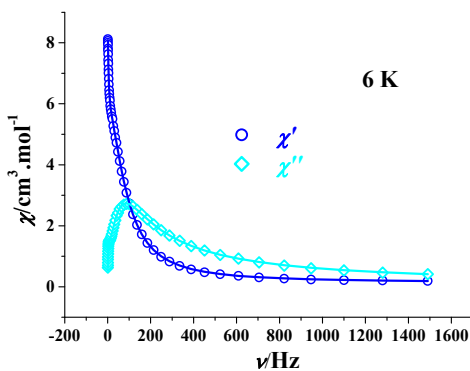

Fig. S5. Frequency dependence of the in-phase ( $\chi'$ , top) and out-of-phase ( $\chi''$ , bottom) ac susceptibility of **1** at 6 K. the solid lines represent the best fitting with the sum of two modified Debye functions.

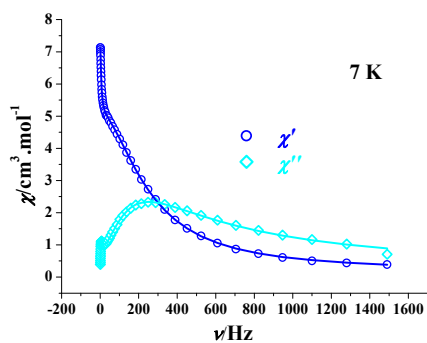

**Fig. S6.** Frequency dependence of the in-phase ( $\chi'$ , top) and out-of-phase ( $\chi''$ , bottom) ac susceptibility of **1** at 7 K. the solid lines represent the best fitting with the sum of two modified Debye functions.

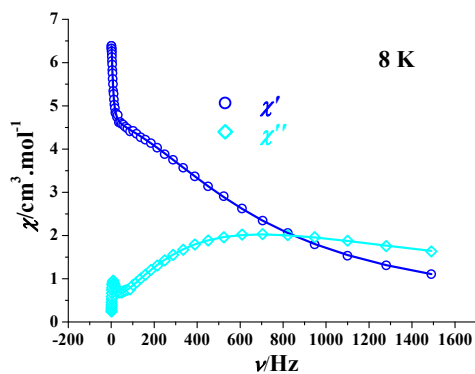

**Fig. S7.** Frequency dependence of the in-phase ( $\chi'$ , top) and out-of-phase ( $\chi''$ , bottom) ac susceptibility of **1** at 8 K. the solid lines represent the best fitting with the sum of two modified Debye functions.

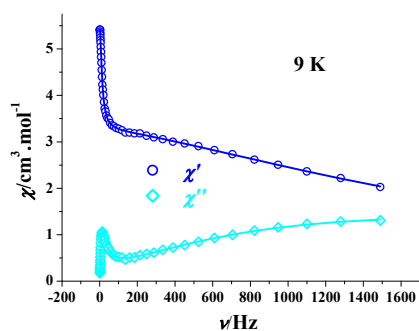

**Fig. S8.** Frequency dependence of the in-phase ( $\chi'$ , top) and out-of-phase ( $\chi''$ , bottom) ac susceptibility of **1** at 9 K. the solid lines represent the best fitting with the sum of two modified Debye functions.

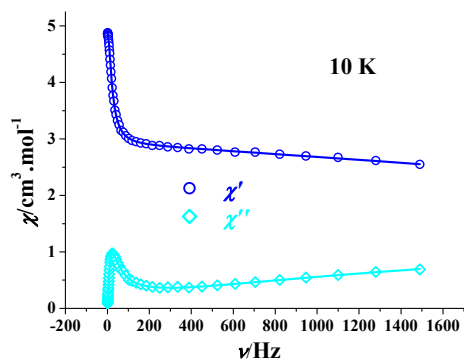

**Fig. S9.** Frequency dependence of the in-phase ( $\chi'$ , top) and out-of-phase ( $\chi''$ , bottom) ac susceptibility of **1** at 10 K. the solid lines represent the best fitting with the sum of two modified Debye functions.

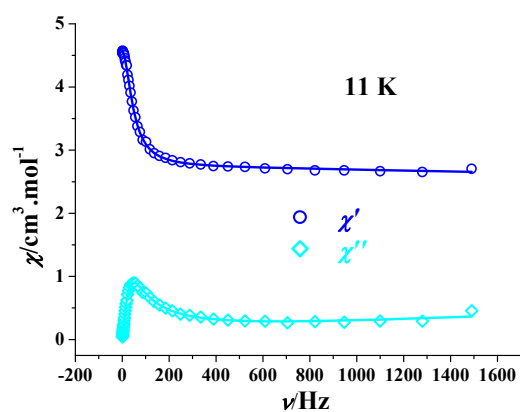

**Fig. S10.** Frequency dependence of the in-phase ( $\chi'$ , top) and out-of-phase ( $\chi''$ , bottom) ac susceptibility of **1** at 11 K. the solid lines represent the best fitting with the sum of two modified Debye functions.
